# Supplementary material
Source: Springer Nature journal article supplement (https://www.springermedizin.de/resource/supplementary/12889_2009_2253_MOESM1_ESM.pdf/9485148)
Supplement: MOESM1 [file 9485148]

Motive/outcome

Consumption

Purchase

Expected health effects from beef

Role of beef in healthful diet

Cues signalling (un)healthy beef

Consumer suggestions to improve beef healthiness
